# Supplementary material for: High-throughput sequence alignment using Graphics Processing Units
Source: Springer Nature journal article supplement (doi:10.1186/1471-2105-8-474), 2007-12-01

Read input  
from user

Copy data to GPU

Execute kernel

Report results  
to user

Copy data back  
to CPU

*CPU*

*GPU*

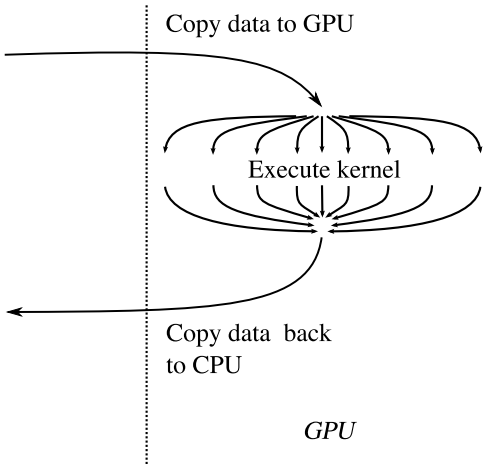

Supplement: 12859_2007_1846_MOESM3_ESM.pdf [file 12859_2007_1846_MOESM3_ESM.pdf]
