# Supplementary material for: High-throughput sequence alignment using Graphics Processing Units
Source: Springer Nature journal article supplement (doi:10.1186/1471-2105-8-474), 2007-12-01
Supplement: 12859_2007_1846_MOESM4_ESM.pdf [file 12859_2007_1846_MOESM4_ESM.pdf]

---

**Algorithm 1: MUMmerGPU**

---

Build  $k$  overlapping suffix trees from reference

**foreach**  $QueryBlock$  **do**

$Output \leftarrow \emptyset$

    Load  $QueryBlock$  onto GPU

**foreach**  $Tree$  **do**

        Load  $Tree$  onto GPU

        Run alignment kernel on  $(QueryBlock, Tree)$

        Add kernel output to  $Output$

        Unload  $Tree$

**foreach**  $query \in QueryBlock$  **do**

        Print output for  $query$  in  $Output$

    Unload  $QueryBlock$

---
