# Supplementary material for: High-throughput sequence alignment using Graphics Processing Units
Source: Springer Nature journal article supplement (doi:10.1186/1471-2105-8-474), 2007-12-01

Time spent by phase in MUMmerGPU

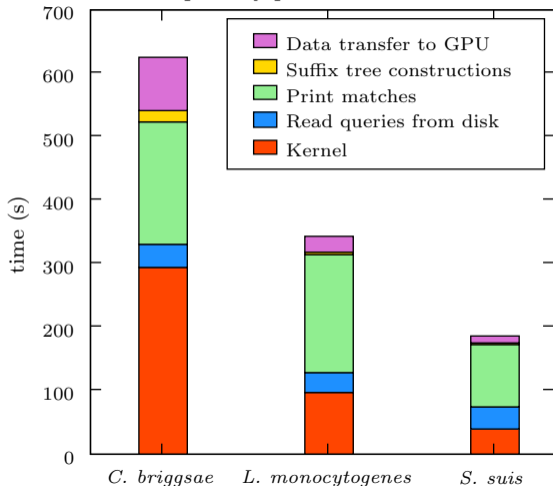

Supplement: 12859_2007_1846_MOESM7_ESM.pdf [file 12859_2007_1846_MOESM7_ESM.pdf]
